# Supplementary material for: The Human Microbiota and Obesity: A Literature Systematic Review of In Vivo Models and Technical Approaches
Source: MDPI journal article supplement (doi:10.3390/ijms19123827), 2018-11-30
Supplement: s1 [file s1]

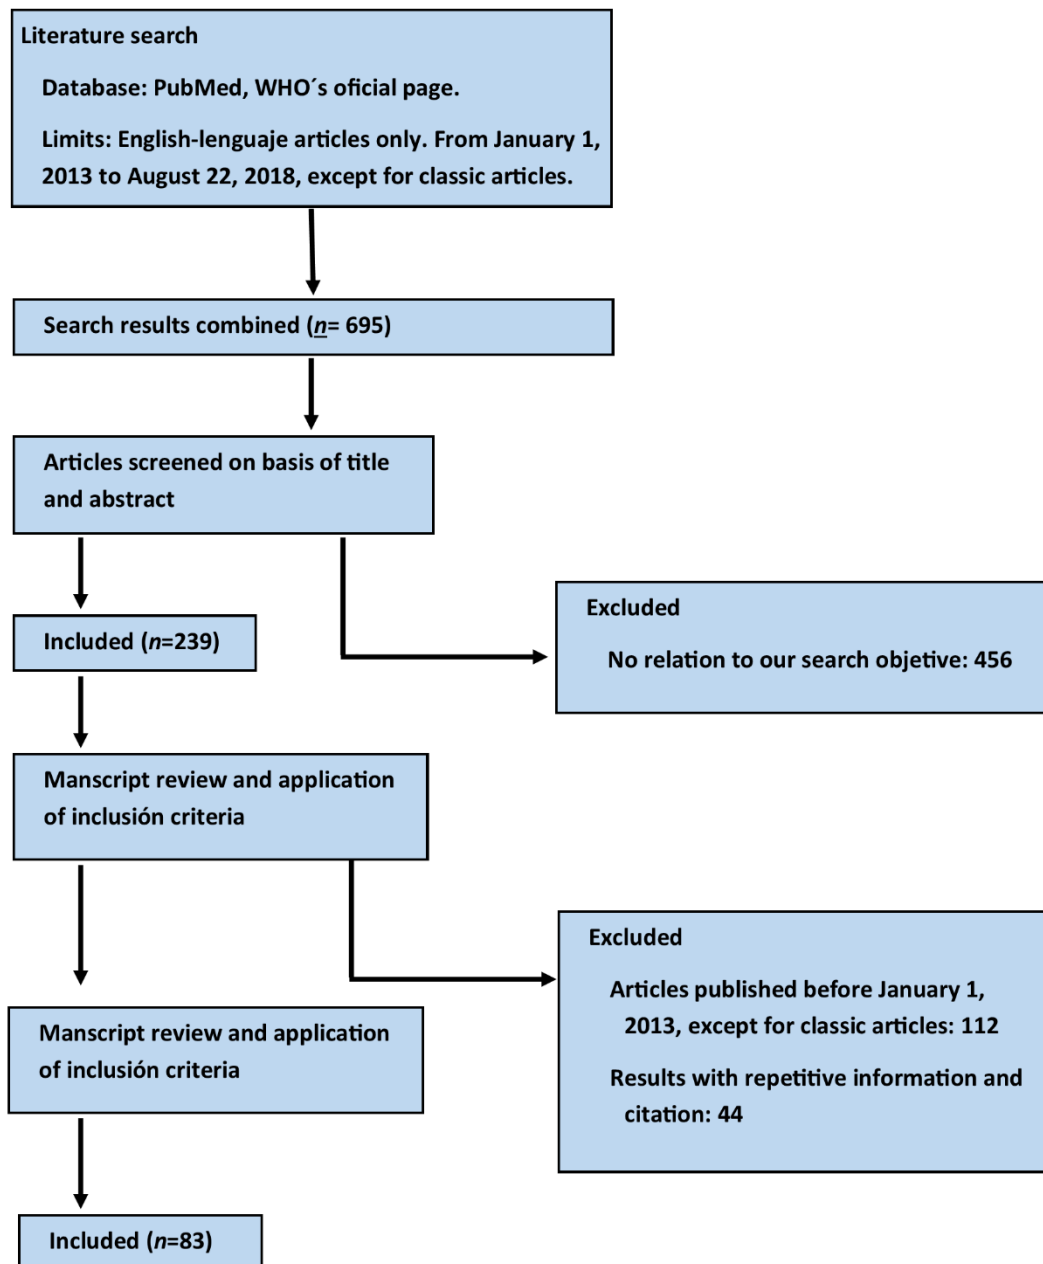

Figure S1. Flow diagram of search strategy and selection criteria.
